# Supplementary material for: WS2 Nanosheet Loaded Silicon-Oxycarbide Electrode for Sodium and Potassium Batteries
Source: MDPI journal article supplement (doi:10.3390/nano12234185), 2022-11-25
Supplement: s1 [file s1]

## Supplementary Materials

# Digital Camera Images of the WS<sub>2</sub>/SiOC fibermats

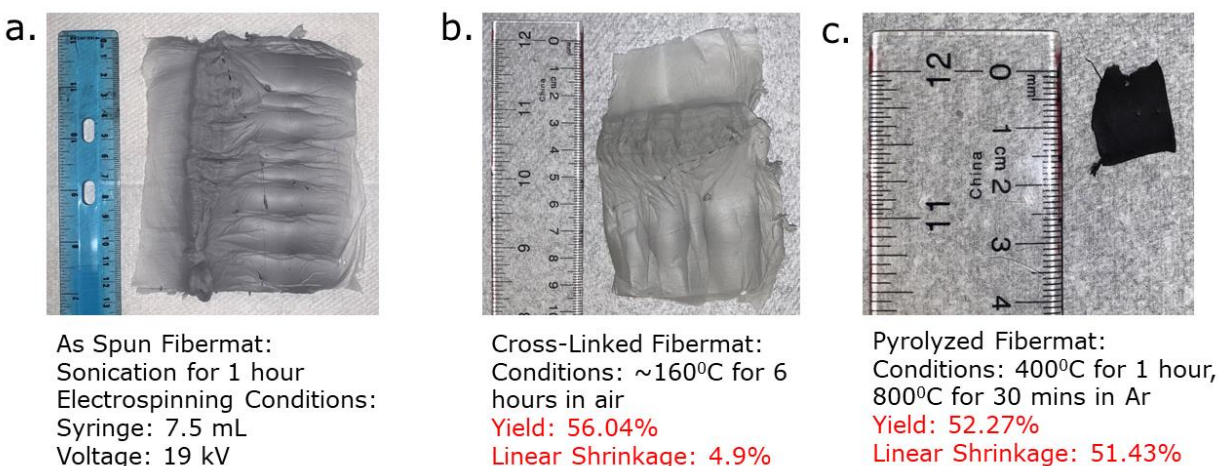

Figure S1: Digital camera images of the WS<sub>2</sub>/SiOC composite fibermats in (a) as-spun; (b) cross-linked; (c) pyrolyzed forms with corresponding weight retention and linear shrinkage values.

Table S1: Elemental Composition of the fibermats by XPS

| Pyrolyzed<br>Fibermats | Elements (Atomic %) |         |         |         |         |
|------------------------|---------------------|---------|---------|---------|---------|
|                        | W4f                 | S2p     | Si2p    | C1s     | O1s     |
| WS <sub>2</sub> /SiOC  | 1.50367             | 1.19286 | 9.56574 | 72.4238 | 15.3139 |

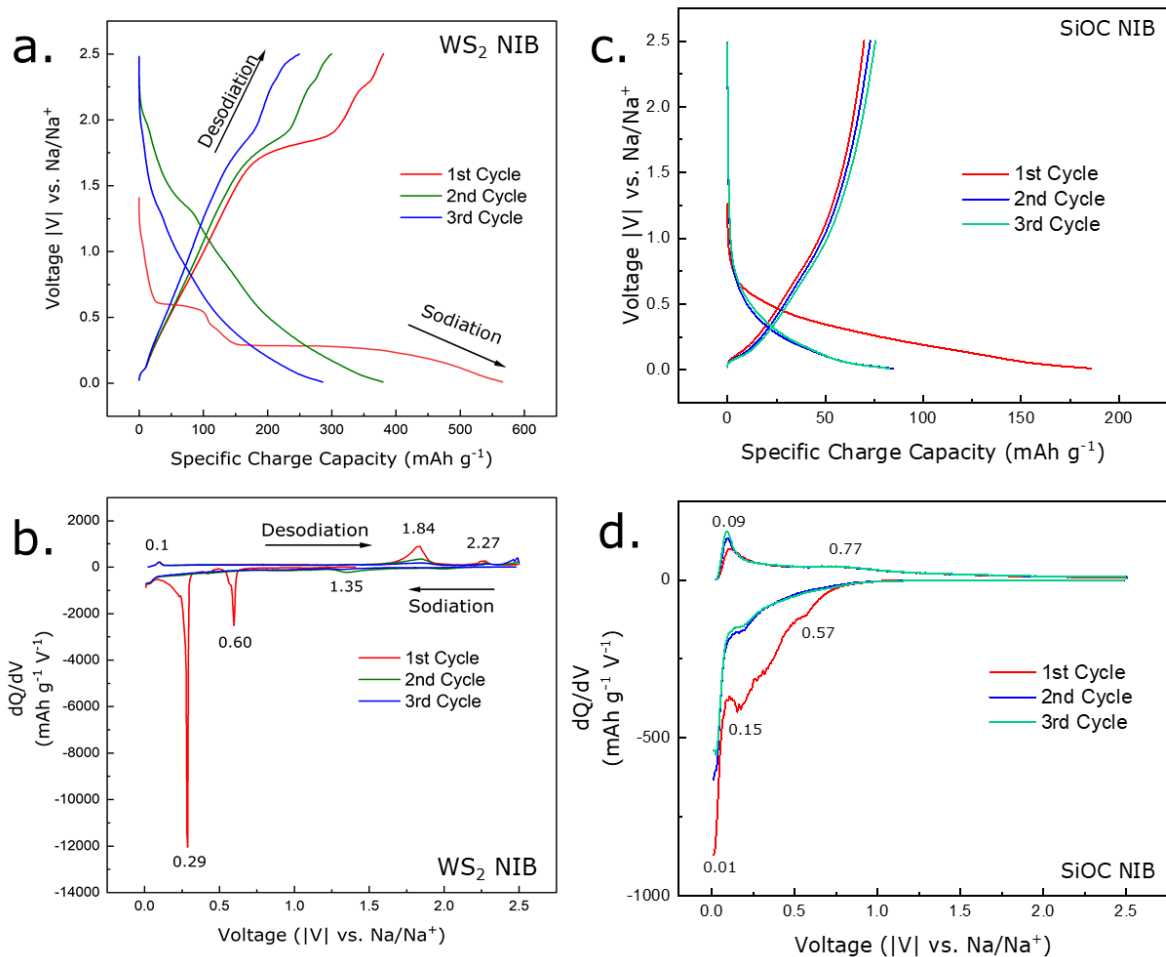

Figure S2: (a) GCD profile of the WS<sub>2</sub> neat electrode when tested in a Na<sup>+</sup> ion half-cell setup; (b) differential capacity curve of the WS<sub>2</sub> neat electrode in Na<sup>+</sup> ion half-cell setup derived from the GCD profile providing information regarding reactions taking place at different voltages; (c) GCD profile of the SiOC fibermat electrode when tested in a Na<sup>+</sup> ion half-cell setup; (d) differential capacity curve of the SiOC fibermat electrode in Na<sup>+</sup> ion half-cell setup derived from the GCD profile providing information regarding reactions taking place at different voltages.

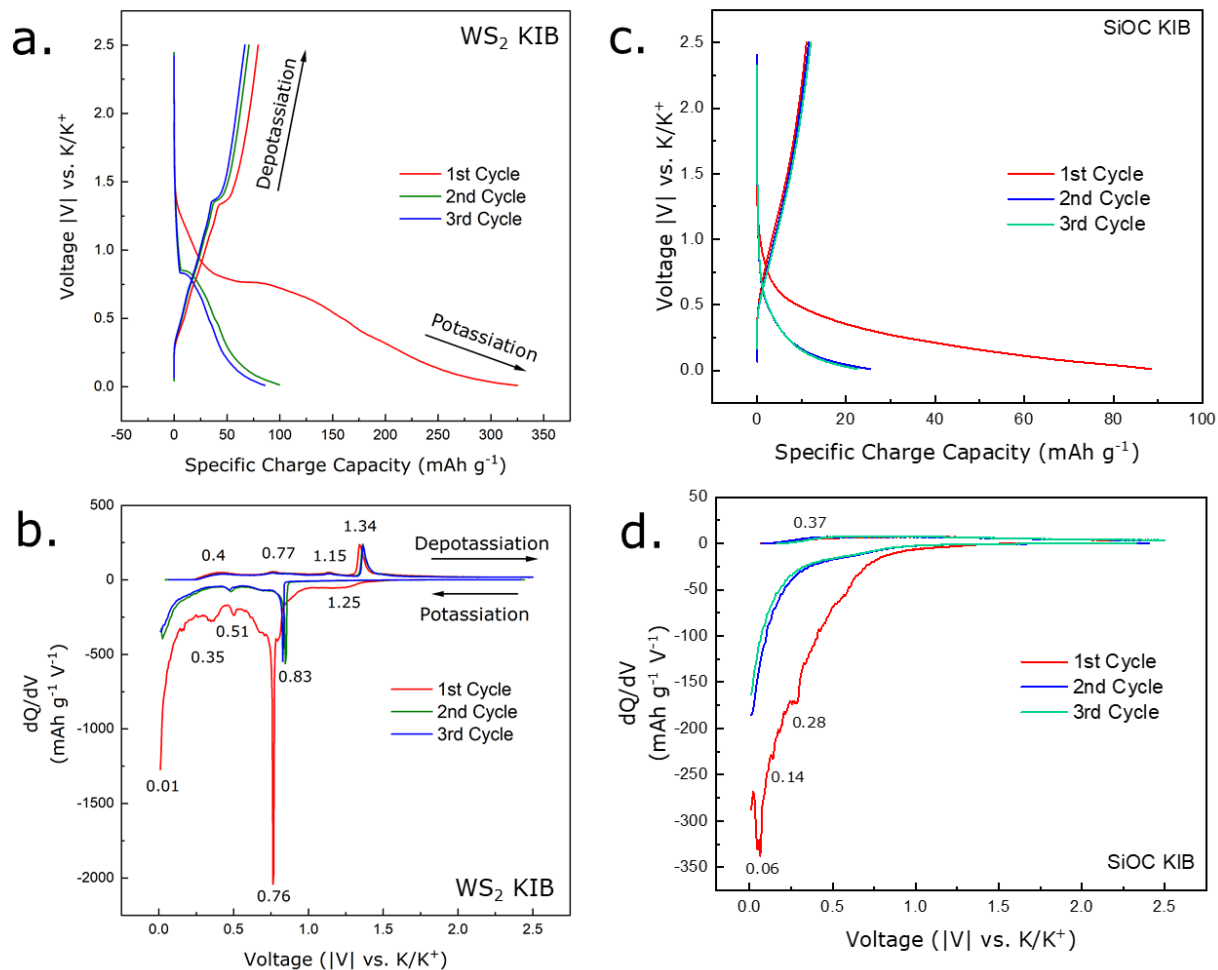

Figure S3: **(a)** GCD profile of the WS<sub>2</sub> neat electrode when tested in a K<sup>+</sup> ion half-cell setup; **(b)** differential capacity curve of the WS<sub>2</sub> neat electrode in K<sup>+</sup> ion half-cell setup derived from the GCD profile providing information regarding reactions taking place at different voltages; **(c)** GCD profile of the SiOC fiber electrode when tested in a K<sup>+</sup> ion half-cell setup; **(d)** differential capacity curve of the SiOC fiber electrode in K<sup>+</sup> ion half-cell setup derived from the GCD profile providing information regarding reactions taking place at different voltages.

Table S2: Summary and comparison of electrochemical performance for Na<sup>+</sup> storage of other nanomaterial-based structures with this work.

| Anode Materials                                                        | Rate Capability                                                                                                                                                | Reference |
|------------------------------------------------------------------------|----------------------------------------------------------------------------------------------------------------------------------------------------------------|-----------|
| WS <sub>2</sub> /SiOC                                                  | 474.88 mAh g <sup>-1</sup> @100 mA g <sup>-1</sup><br>399.68 mAh g <sup>-1</sup> @200 mA g <sup>-1</sup><br>313.33 mAh g <sup>-1</sup> @400 mA g <sup>-1</sup> | This work |
| W <sub>0.9</sub> Mo <sub>0.1</sub> S <sub>2</sub>                      | 262 mAh g <sup>-1</sup> @1000 mA g <sup>-1</sup>                                                                                                               | [1]       |
| WS <sub>2</sub> /NC                                                    | 320 mAh g <sup>-1</sup> @200 mA g <sup>-1</sup>                                                                                                                | [2]       |
| MoS <sub>2</sub> /RGO                                                  | 253.1 mAh g <sup>-1</sup> @100 mA g <sup>-1</sup>                                                                                                              | [3]       |
| WS <sub>2</sub> -S/N-C                                                 | 319 mAh g <sup>-1</sup> @100 mA g <sup>-1</sup>                                                                                                                | [4]       |
| MoS <sub>2</sub> -N-RGO                                                | 250 mAh g <sup>-1</sup> @1000 mA g <sup>-1</sup>                                                                                                               | [5]       |
| WS <sub>2</sub> /3DCD                                                  | 392.1 mAh g <sup>-1</sup> @200 mA g <sup>-1</sup>                                                                                                              | [6]       |
| DODA-WS <sub>2</sub>                                                   | 318 mAh g <sup>-1</sup> @1000 mA g <sup>-1</sup>                                                                                                               | [7]       |
| 1T-MoS <sub>2</sub>                                                    | 324 mAh g <sup>-1</sup> @1000 mA g <sup>-1</sup>                                                                                                               | [8]       |
| 2H-WS <sub>2</sub>                                                     | 353.2 mAh g <sup>-1</sup> @200 mA g <sup>-1</sup>                                                                                                              | [9]       |
| WS <sub>2</sub> @moS <sub>2</sub> @C/rGO                               | 411.8 mAh g <sup>-1</sup> @500 mA g <sup>-1</sup>                                                                                                              | [10]      |
| WS <sub>2</sub> /CNT-rGO ordered 3D aerogel                            | 311.4 mAh g <sup>-1</sup> @100 mA g <sup>-1</sup><br>302.8 mAh g <sup>-1</sup> @200 mA g <sup>-1</sup><br>289 mAh g <sup>-1</sup> @500 mA g <sup>-1</sup>      | [11]      |
| MoS <sub>2</sub> /graphene paper                                       | 240 mAh g <sup>-1</sup> @25 mA g <sup>-1</sup><br>214 mAh g <sup>-1</sup> @100 mA g <sup>-1</sup><br>173 mAh g <sup>-1</sup> @200 mA g <sup>-1</sup>           | [12]      |
| MXene@Co <sub>9</sub> S <sub>8</sub> /CoMo <sub>2</sub> S <sub>4</sub> | 325 mAh g <sup>-1</sup> @100 mA g <sup>-1</sup><br>309 mAh g <sup>-1</sup> @200 mA g <sup>-1</sup><br>284 mAh g <sup>-1</sup> @100 mA g <sup>-1</sup>          | [13]      |

Table S3: Summary and comparison of electrochemical performance for K<sup>+</sup> storage of other nanomaterial-based structures with this work.

| Anode Materials                  | Rate Capability                                                                                                                                                | Reference |
|----------------------------------|----------------------------------------------------------------------------------------------------------------------------------------------------------------|-----------|
| WS <sub>2</sub> /SiOC            | 218.91 mAh g <sup>-1</sup> @100 mA g <sup>-1</sup><br>158.16 mAh g <sup>-1</sup> @200 mA g <sup>-1</sup><br>125.92 mAh g <sup>-1</sup> @400 mA g <sup>-1</sup> | This work |
| D-TiS <sub>2</sub>               | 124 mAh g <sup>-1</sup> @50 mA g <sup>-1</sup><br>100 mAh g <sup>-1</sup> @100 mA g <sup>-1</sup>                                                              | [14]      |
| TiSe <sub>2</sub>                | 89 mAh g <sup>-1</sup> @50 mA g <sup>-1</sup><br>67 mAh g <sup>-1</sup> @100 mA g <sup>-1</sup>                                                                | [15]      |
| Commercial WS <sub>2</sub>       | 109 mAh g <sup>-1</sup> @50 mA g <sup>-1</sup><br>74 mAh g <sup>-1</sup> @100 mA g <sup>-1</sup>                                                               | [16]      |
| Hexagonal 2H-WS <sub>2</sub>     | 67 mAh g <sup>-1</sup> @5 mA g <sup>-1</sup><br>40 mAh g <sup>-1</sup> @200 mA g <sup>-1</sup>                                                                 | [17]      |
| HeTiO <sub>2</sub> c Micro-tubes | 197.5 mAh g <sup>-1</sup> @100 mA g <sup>-1</sup>                                                                                                              | [18]      |
| Graphite                         | 197 mAh g <sup>-1</sup> @C/2                                                                                                                                   | [19]      |
| Soft Carbon                      | 160 mAh g <sup>-1</sup> @2C                                                                                                                                    | [19]      |
| Hard Carbon Microspheres         | 216 mAh g <sup>-1</sup> @C/10                                                                                                                                  | [20]      |
| Tin Based Composite              | 110 mAh g <sup>-1</sup> @25 mA g <sup>-1</sup>                                                                                                                 | [21]      |
| Reduced graphene oxide           | 90 mAh g <sup>-1</sup> @50 mA g <sup>-1</sup><br>50 mAh g <sup>-1</sup> @100 mA g <sup>-1</sup>                                                                | [22]      |
| Tire -derived Carbon             | 155 mAh g <sup>-1</sup> @140 mA g <sup>-1</sup>                                                                                                                | [23]      |

## References

1. Tao, H.; Li, J.; Li, J.; Hou, Z.; Yang, X.; Fan, L.-Z. Metallic phase W<sub>0.9</sub>Mo<sub>0.1</sub>S<sub>2</sub> for high-performance anode of sodium ion batteries through suppressing the dissolution of polysulfides. *Journal of Energy Chemistry* **2022**, *66*, 356-365, doi:https://doi.org/10.1016/j.jechem.2021.08.026.
2. Lim, Y.V.; Wang, Y.; Kong, D.; Guo, L.; Wong, J.I.; Ang, L.K.; Yang, H.Y. Cubic-shaped WS<sub>2</sub> nanopetals on a Prussian blue derived nitrogen-doped carbon nanoporous framework for high performance sodium-ion batteries. *Journal of Materials Chemistry A* **2017**, *5*, 10406-10415, doi:10.1039/C7TA01821E.
3. Zhang, X.; Liu, K.; Zhang, S.; Miao, F.; Xiao, W.; Shen, Y.; Zhang, P.; Wang, Z.; Shao, G. Enabling remarkable cycling performance of high-loading MoS<sub>2</sub>@Graphene anode for sodium ion batteries with tunable cut-off voltage. *Journal of Power Sources* **2020**, *458*, 228040, doi:https://doi.org/10.1016/j.jpowsour.2020.228040.
4. Li, X.; Sun, Y.; Xu, X.; Wang, Y.-X.; Chou, S.-L.; Cao, A.; Chen, L.; Dou, S.-X. Lotus rhizome-like S/N-C with embedded WS<sub>2</sub> for superior sodium storage. *Journal of Materials Chemistry A* **2019**, *7*, 25932-25943, doi:10.1039/C9TA09373G.
5. Zhan, W.; Zhu, M.; Lan, J.; Yuan, H.; Wang, H.; Yang, X.; Sui, G. All-in-One MoS<sub>2</sub> Nanosheets Tailored by Porous Nitrogen-Doped Graphene for Fast and Highly Reversible Sodium Storage. *ACS Applied Materials & Interfaces* **2020**, *12*, 51488-51498, doi:10.1021/acsami.0c15169.
6. Wang, Y.; Kong, D.; Huang, S.; Shi, Y.; Ding, M.; Von Lim, Y.; Xu, T.; Chen, F.; Li, X.; Yang, H.Y. 3D carbon foam-supported WS<sub>2</sub> nanosheets for cable-shaped flexible sodium ion batteries. *Journal of Materials Chemistry A* **2018**, *6*, 10813-10824, doi:10.1039/C8TA02773K.
7. Xu, X.; Li, X.; Zhang, J.; Qiao, K.; Han, D.; Wei, S.; Xing, W.; Yan, Z. Surfactant assisted electrospinning of WS<sub>2</sub> nanofibers and its promising performance as anode material of sodium-ion batteries. *Electrochimica Acta* **2019**, *302*, 259-269, doi:https://doi.org/10.1016/j.electacta.2019.02.042.
8. Sun, D.; Huang, D.; Wang, H.; Xu, G.-L.; Zhang, X.; Zhang, R.; Tang, Y.; Abd El-Hady, D.; Alshitari, W.; Saad Al-Bogami, A.; et al. 1T MoS<sub>2</sub> nanosheets with extraordinary sodium storage properties via thermal-driven ion intercalation assisted exfoliation of bulky MoS<sub>2</sub>. *Nano Energy* **2019**, *61*, 361-369, doi:https://doi.org/10.1016/j.nanoen.2019.04.063.
9. Luo, X.; Huang, J.; Huang, Y.; Cao, L.; Li, J.; Wang, Y.; Xu, Z.; Wei, S.; Kajiyoshi, K. Self-templated induced carbon-supported hollow WS<sub>2</sub> composite structure for high-performance sodium storage. *Journal of Materials Chemistry A* **2021**, *9*, 21366-21378, doi:10.1039/D1TA04858A.
10. Rao, Y.; Wang, J.; Liang, P.; Zheng, H.; Wu, M.; Chen, J.; Shi, F.; Yan, K.; Liu, J.; Bian, K.; et al. Heterostructured WS<sub>2</sub>/MoS<sub>2</sub>@carbon hollow microspheres anchored on graphene for high-performance Li/Na storage. *Chemical Engineering Journal* **2022**, *443*, 136080, doi:https://doi.org/10.1016/j.cej.2022.136080.
11. Wang, Y.; Kong, D.; Shi, W.; Liu, B.; Sim, G.J.; Ge, Q.; Yang, H.Y. Ice Templated Free-Standing Hierarchically WS<sub>2</sub>/CNT-rGO Aerogel for High-Performance Rechargeable Lithium and Sodium Ion Batteries. *Advanced Energy Materials* **2016**, *6*, 1601057, doi:https://doi.org/10.1002/aenm.201601057.
12. David, L.; Bhandavat, R.; Singh, G. MoS<sub>2</sub>/Graphene Composite Paper for Sodium-Ion Battery Electrodes. *ACS Nano* **2014**, *8*, 1759-1770, doi:10.1021/nn406156b.
13. Wang, M.; Liu, X.; Qin, B.; Li, Z.; Zhang, Y.; Yang, W.; Fan, H. In-situ etching and ion exchange induced 2D-2D MXene@Co<sub>9</sub>S<sub>8</sub>/CoMo<sub>2</sub>S<sub>4</sub> heterostructure for superior Na<sup>+</sup> storage. *Chemical Engineering Journal* **2023**, *451*, 138508, doi:https://doi.org/10.1016/j.cej.2022.138508.
14. Liu, T.; Zhang, X.; Xia, M.; Yu, H.; Peng, N.; Jiang, C.; Shui, M.; Xie, Y.; Yi, T.-F.; Shu, J. Functional cation defects engineering in TiS<sub>2</sub> for high-stability anode. *Nano Energy* **2020**, *67*, 104295, doi:https://doi.org/10.1016/j.nanoen.2019.104295.
15. Li, P.; Zheng, X.; Yu, H.; Zhao, G.; Shu, J.; Xu, X.; Sun, W.; Dou, S.X. Electrochemical potassium/lithium-ion intercalation into TiSe<sub>2</sub>: Kinetics and mechanism. *Energy Storage Materials* **2019**, *16*, 512-518, doi:https://doi.org/10.1016/j.ensm.2018.09.014.
16. Wu, Y.; Xu, Y.; Li, Y.; Lyu, P.; Wen, J.; Zhang, C.; Zhou, M.; Fang, Y.; Zhao, H.; Kaiser, U.; et al. Unexpected intercalation-dominated potassium storage in WS<sub>2</sub> as a potassium-ion battery anode. *Nano Research* **2019**, *12*, 2997-3002, doi:10.1007/s12274-019-2543-0.
17. Zhang, R.; Bao, J.; Pan, Y.; Sun, C.-F. Highly reversible potassium-ion intercalation in tungsten disulfide. *Chemical Science* **2019**, *10*, 2604-2612, doi:10.1039/C8SC04350G.
18. Li, Y.; Yang, C.; Zheng, F.; Pan, Q.; Liu, Y.; Wang, G.; Liu, T.; Hu, J.; Liu, M. Design of TiO<sub>2</sub>@C hierarchical tubular heterostructures for high performance potassium ion batteries. *Nano Energy* **2019**, *59*, 582-590, doi:https://doi.org/10.1016/j.nanoen.2019.03.002.
19. Jian, Z.; Luo, W.; Ji, X. Carbon Electrodes for K-Ion Batteries. *Journal of the American Chemical Society* **2015**, *137*, 11566-11569, doi:10.1021/jacs.5b06809.
20. Jian, Z.; Xing, Z.; Bommier, C.; Li, Z.; Ji, X. Hard Carbon Microspheres: Potassium-Ion Anode Versus Sodium-Ion Anode. *Advanced Energy Materials* **2016**, *6*, 1501874, doi:https://doi.org/10.1002/aenm.201501874.
21. Sultana, I.; Ramireddy, T.; Rahman, M.M.; Chen, Y.; Glushenkov, A.M. Tin-based composite anodes for potassium-ion batteries. *Chemical Communications* **2016**, *52*, 9279-9282, doi:10.1039/C6CC03649J.

22. Luo, W.; Wan, J.; Ozdemir, B.; Bao, W.; Chen, Y.; Dai, J.; Lin, H.; Xu, Y.; Gu, F.; Barone, V.; et al. Potassium Ion Batteries with Graphitic Materials. *Nano Letters* **2015**, *15*, 7671-7677, doi:10.1021/acs.nanolett.5b03667.
23. Li, Y.; Adams, R.A.; Arora, A.; Pol, V.G.; Levine, A.M.; Lee, R.J.; Akato, K.; Naskar, A.K.; Paranthaman, M.P. Sustainable Potassium-Ion Battery Anodes Derived from Waste-Tire Rubber. *Journal of The Electrochemical Society* **2017**, *164*, A1234, doi:10.1149/2.1391706jes.
